# Supplementary material
Source: ML conference proceedings conference paper supplement (https://www.ecva.net/papers/eccv_2022/papers_ECCV/html/136970001_ECCV_2022_paper.php)
Supplement: Supplementary file 1 [file 136970001-supp.pdf]

# 1 Appendix

## 1.1 More Results for LRI construction

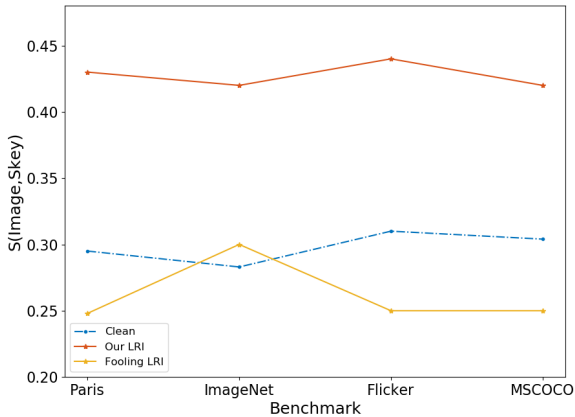

Fig. 1: Cosine Similarity  $S(\text{Image}, \text{Skey})$  on ViT-B/32 on different benchmarks.

We further investigate the correlation (cosine similarity) between the generated LRI and the predefined secret keyword (“ $S(\text{LRI}, \text{Skey})$ ”) in Fig. 1. We first calculate the average cosine similarity between clean images and its label/caption as “clean”, and then compute the average cosine similarity between the LRI generated by using our method/Fooling [48] and “Skey” labeled as “Our LRI”/“Fooling LRI”, respectively. We observe a significantly tighter connection between LRI and skey generated by our method compared to Fooling [48], thus making our LRI more robust in the image retrieval system.
